# Supplementary material for: Heterologous expression and purification of recombinant human protoporphyrinogen oxidase IX: A comparative study
Source: PubMed Central journal article supplement (PMC8601502; doi:10.1371/journal.pone.0259837), 2021-11-18

# Supplementary figure 1 - raw images of western blots and gels

## Raw image 2A - CBB-stained gel

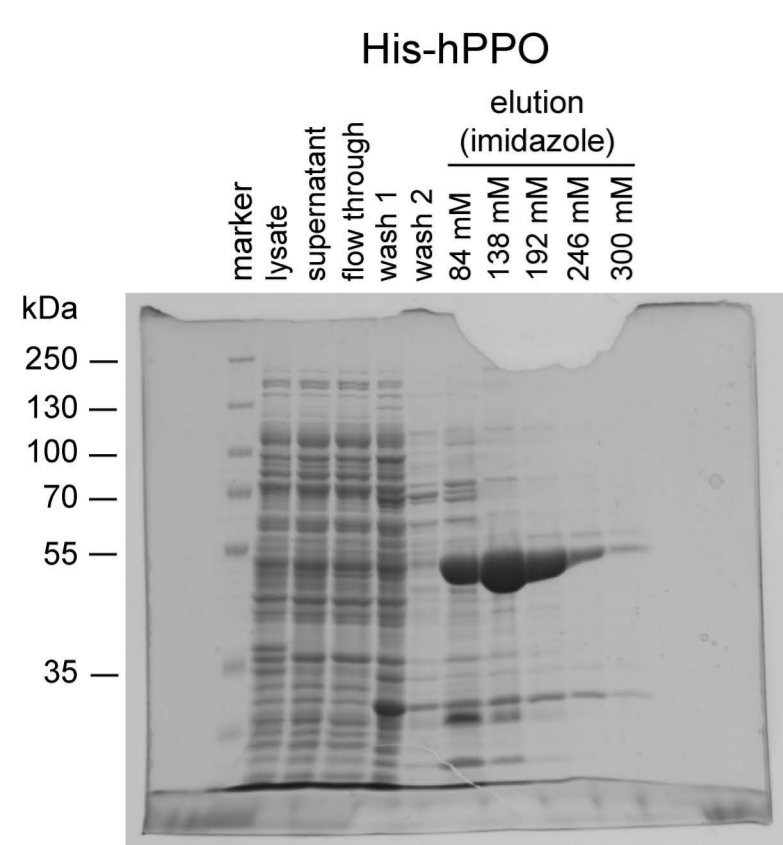

## Raw image 2B - CBB-stained gel

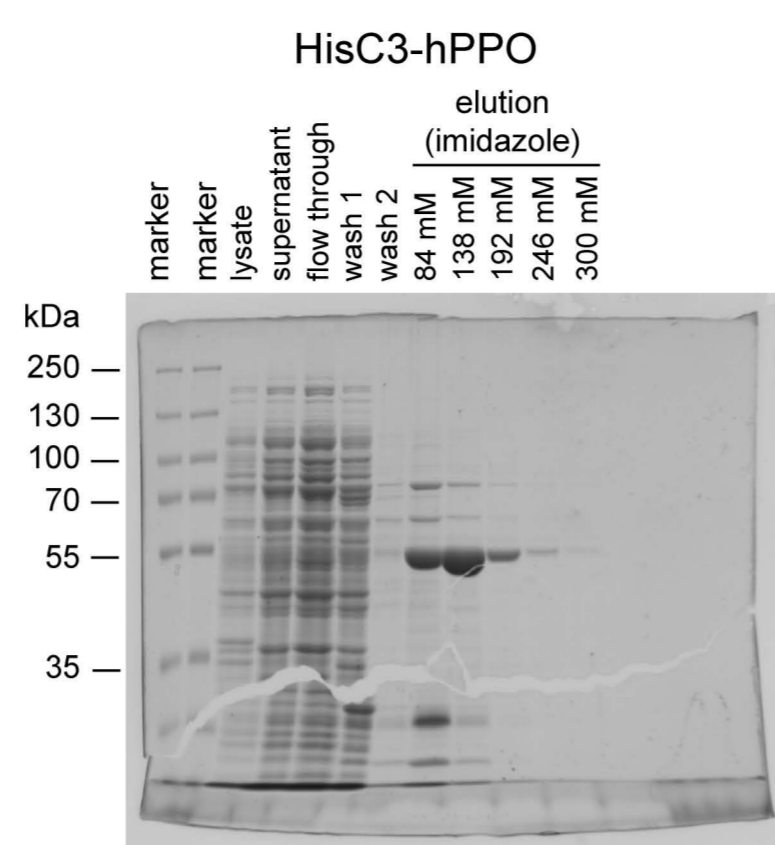

## Raw image 2C - CBB-stained gel

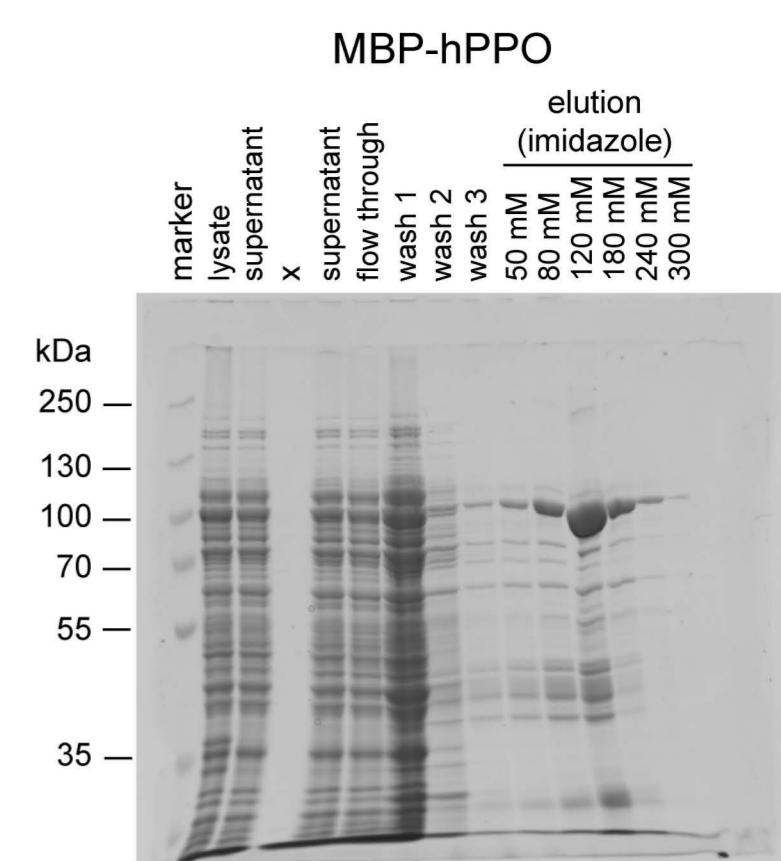

## Raw image 3A - CBB-stained gel

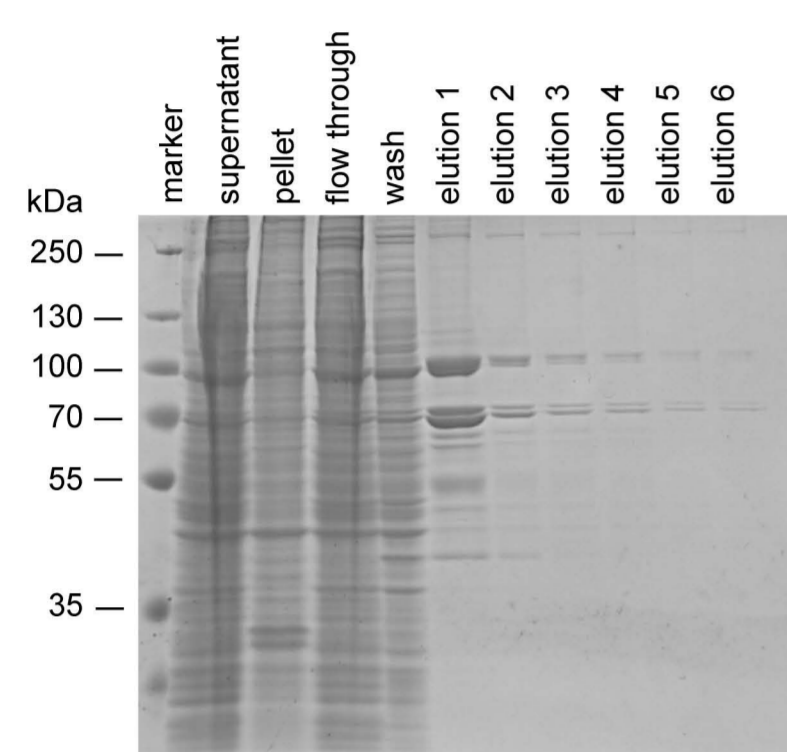

## Raw image 3B - western blot

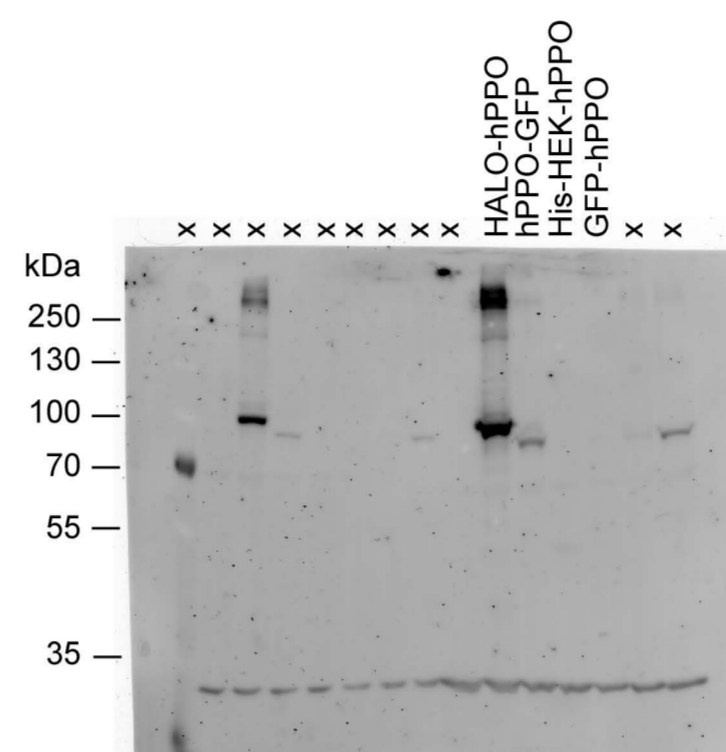

## Raw image 3C

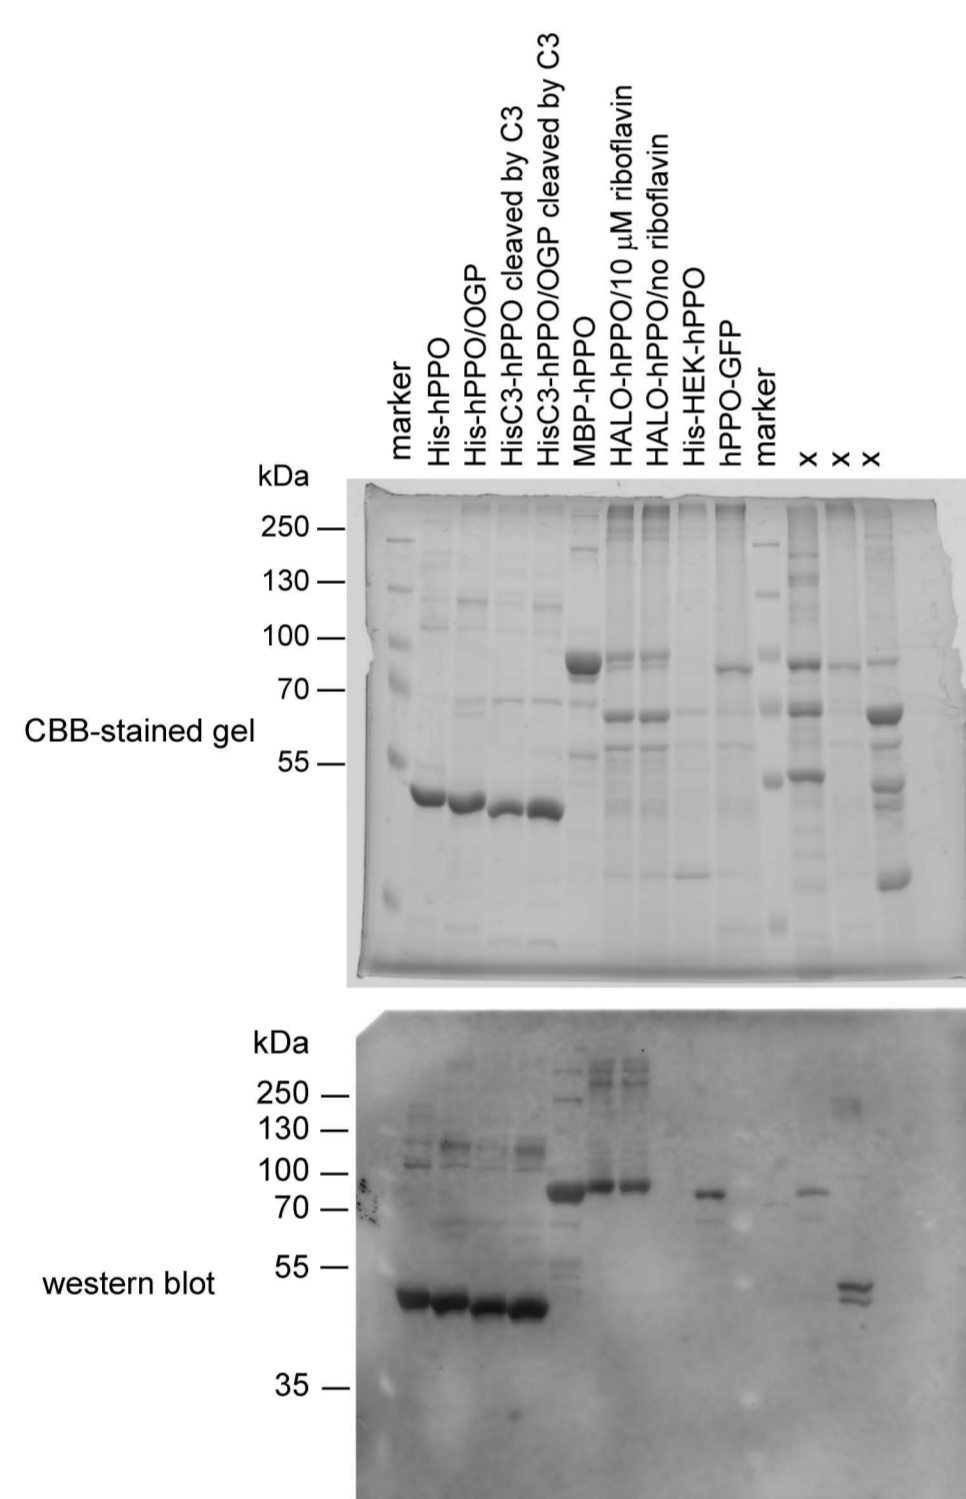

## Raw image 3F - western blot

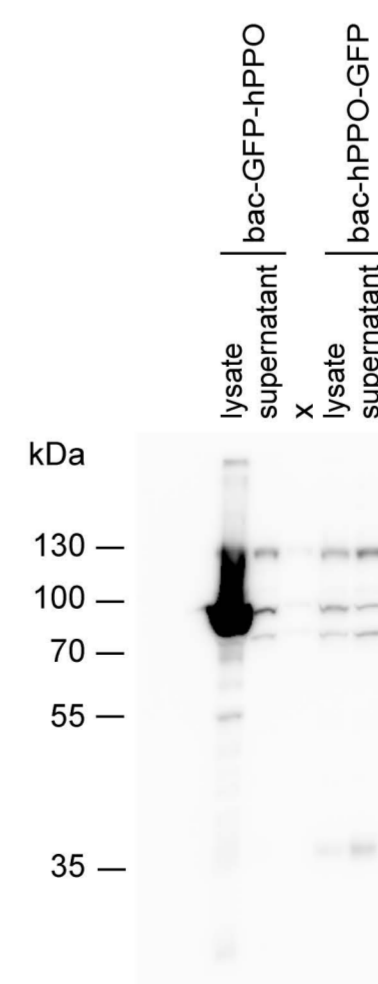

## Raw image 3E - CBB-stained gel

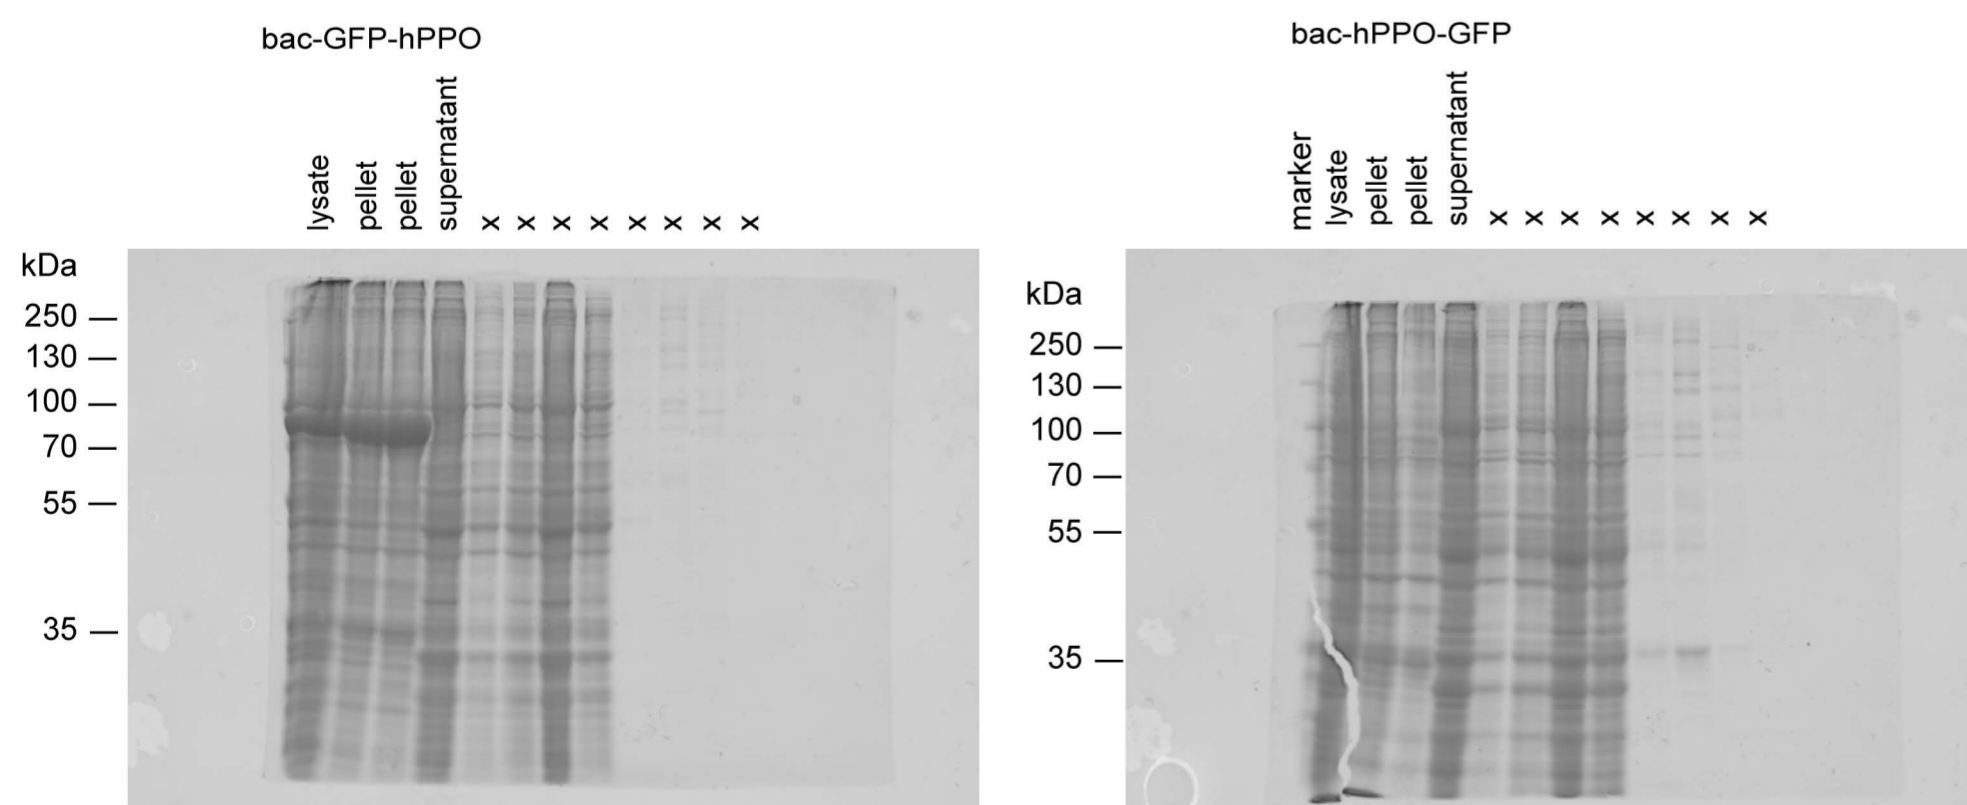

## Raw image 4C - CBB-stained gel

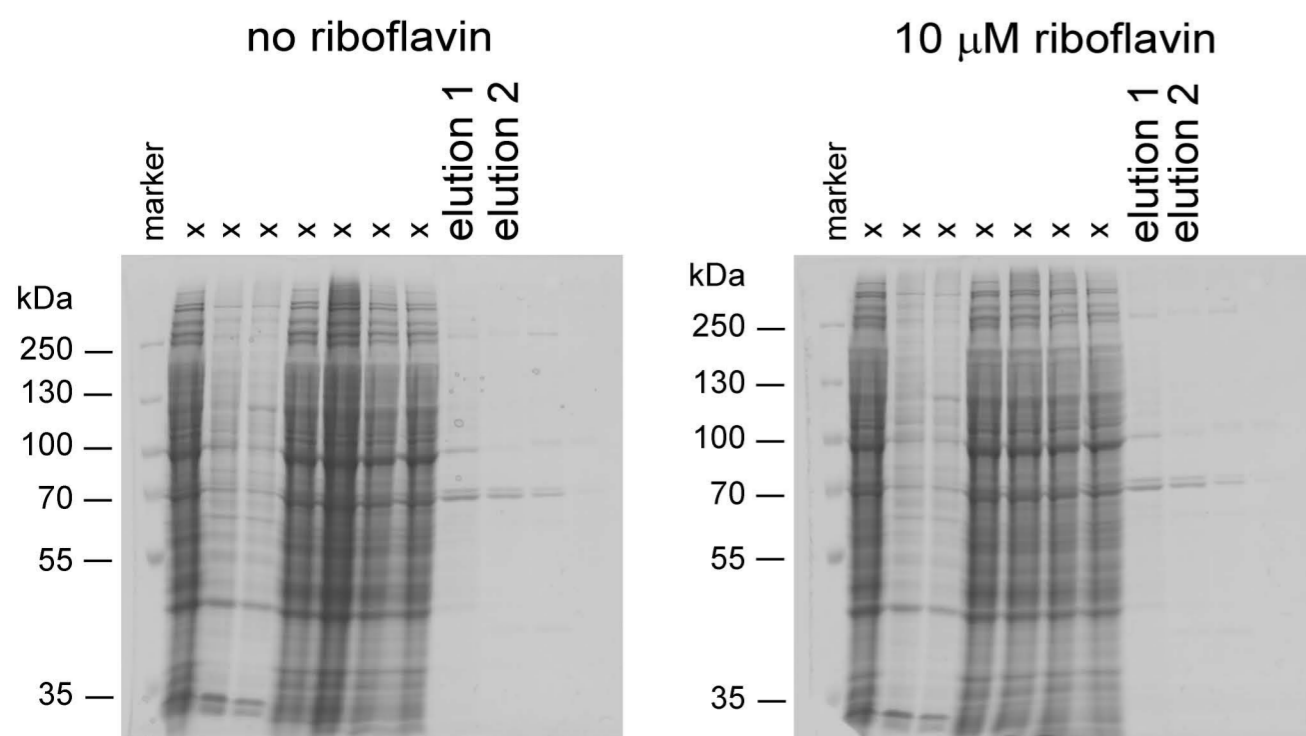

Supplement: pone.0259837.s001.pdf [file pone.0259837.s001.pdf]
